# Supplementary material for: Functional ability and quality of life in critical illness survivors with intensive care unit acquired weakness: A secondary analysis of a randomised controlled trial
Source: PubMed Central journal article supplement (PMC7056321; doi:10.1371/journal.pone.0229725), 2020-03-04
Supplement: pone.0229725.s002.pdf [file pone.0229725.s002.pdf]

# S1 File.

**S2 Table. Baseline characteristics based upon completed and missing MRC-SS.**

| variable                                              | n  | completed MRC-SS   | n  | missing MRC-SS      | p-value           |
|-------------------------------------------------------|----|--------------------|----|---------------------|-------------------|
| <b>MRC sum-score at ICU discharge (0-60)</b>          | 83 | 45 [38.5, 54]      |    | NA [NA, NA]         |                   |
| <b>Randomized to non-standard intervention</b>        | 83 | 40 (48%)           | 32 | 18 (56%)            | <b>0.57</b>       |
| <b>Age (years)</b>                                    | 83 | 67.5 [55.55, 75.4] | 32 | 67.6 [57.7, 73.53]  | <b>0.84</b>       |
| <b>Gender (male)</b>                                  | 83 | 52 (63%)           | 32 | 25 (78%)            | <b>0.17</b>       |
| <b>BMI (kg/m<sup>2</sup>)</b>                         | 83 | 26.2 [23.6, 31.35] | 32 | 26.35 [24.62, 28.1] | <b>0.72</b>       |
| <b>Weight (kg)</b>                                    | 83 | 80 [66, 90]        | 32 | 82 [74.75, 90.25]   | <b>0.35</b>       |
| <b>ICU diagnosis on ICU admission</b>                 | 83 |                    | 32 |                     | <b>0.57</b>       |
| gastroenterology                                      |    | 11 (13%)           |    | 3 (9%)              |                   |
| heart surgery                                         |    | 18 (22%)           |    | 3 (9%)              |                   |
| hemodynamic insufficiency                             |    | 16 (19%)           |    | 10 (31%)            |                   |
| neurology / neurosurgery                              |    | 4 (5%)             |    | 5 (16%)             |                   |
| other                                                 |    | 1 (1%)             |    | 1 (3%)              |                   |
| other surgery                                         |    | 11 (13%)           |    | 3 (9%)              |                   |
| respiratory insufficiency                             |    | 20 (24%)           |    | 5 (16%)             |                   |
| trauma                                                |    | 2 (2%)             |    | 2 (6%)              |                   |
| <b>APACHE II score (0-71) <sup>a</sup></b>            | 83 | 21 [17, 26]        | 32 | 27 [21.5, 30]       | <b>&lt; 0.001</b> |
| <b>SOFA score (0-24) <sup>b</sup></b>                 | 83 | 8 [6, 10]          | 32 | 10 [8, 14.25]       | <b>&lt; 0.001</b> |
| <b>ICU days until study inclusion</b>                 | 83 | 1.71 [0.85, 2.57]  | 32 | 1.82 [1.08, 2.39]   | <b>0.60</b>       |
| <b>Restricted in activities of daily living (ADL)</b> | 80 | 8 (10%)            | 31 | 5 (16%)             | <b>0.57</b>       |
| <b>NYHA symptoms (stage 2 to 4)</b>                   | 80 | 36 (45%)           | 31 | 12 (39%)            | <b>0.70</b>       |
| <b>Dyspnoea symptoms</b>                              | 80 | 20 (25%)           | 31 | 10 (32%)            | <b>0.59</b>       |
| <b>Hematologic malignancy</b>                         | 80 | 3 (4%)             | 31 | 2 (6%)              | <b>0.92</b>       |
| <b>Immunosuppression</b>                              | 80 | 11 (14%)           | 31 | 5 (16%)             | <b>0.98</b>       |
| <b>Liver disease</b>                                  | 80 | 7 (9%)             | 31 | 8 (26%)             | <b>0.04</b>       |
| <b>Chronic dialysis</b>                               | 80 | 0 (0%)             | 31 | 0 (0%)              |                   |

<sup>a</sup> at ICU admission

<sup>b</sup> at study inclusion

Comparison of baseline characteristics of patients with observed MRC-SS and patients for whom we could not collect MRC-SS. Data are presented as median [25%, 75%] or frequencies (%).

**Abbreviations:** NA = not available, NYHA = New York Heart Association, BMI = Body Mass Index, APACHE = Acute Physiology and Chronic Health Evaluation, SOFA = Sequential Organ Failure Assessment
